# Supplementary material
Source: PubMed Central journal article supplement (PMC3732068)
Supplement: supp_cvs261_cvs261supp_fig1.pdf [file supp_cvs261_cvs261supp_fig1.pdf]

**A.**

|                                                                  | Sham + HA | Sham + SOCS |
|------------------------------------------------------------------|-----------|-------------|
| LV wet / Body weight, <i>mg/g</i>                                | 1.5 ± 0.4 | 1.5 ± 0.3   |
| Collagen volume fraction, %                                      | 3.2 ± 0.1 | 3.5 ± 0.2   |
| Capillary density, <i>n°/mm<sup>2</sup></i>                      | 1584 ± 30 | 1640 ± 45   |
| Capillary/Myocyte ratio                                          | 2.9±.7    | 3.1±.8      |
| LV diastolic diameter, <i>mm</i>                                 | 7.8 ± 0.8 | 7.6 ± 0.9   |
| LV fractional shortening, %                                      | 48 ± 4    | 48 ± 5      |
| LV end-diastolic pressure, <i>mmHg</i>                           | 4 ± 2     | 3 ± 2       |
| LV meridional diastolic wall stress, <i>kdyne/cm<sup>2</sup></i> | 8 ± 1     | 8 ± 3       |

**B.**

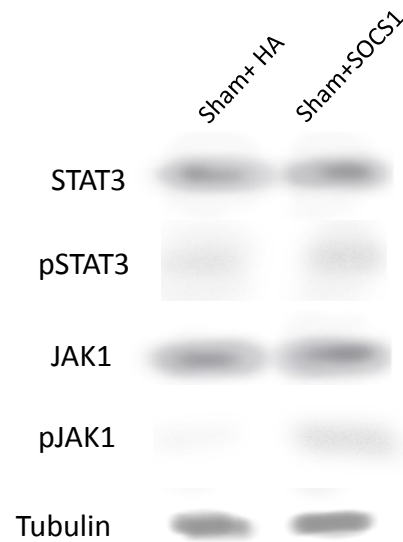

**C.**

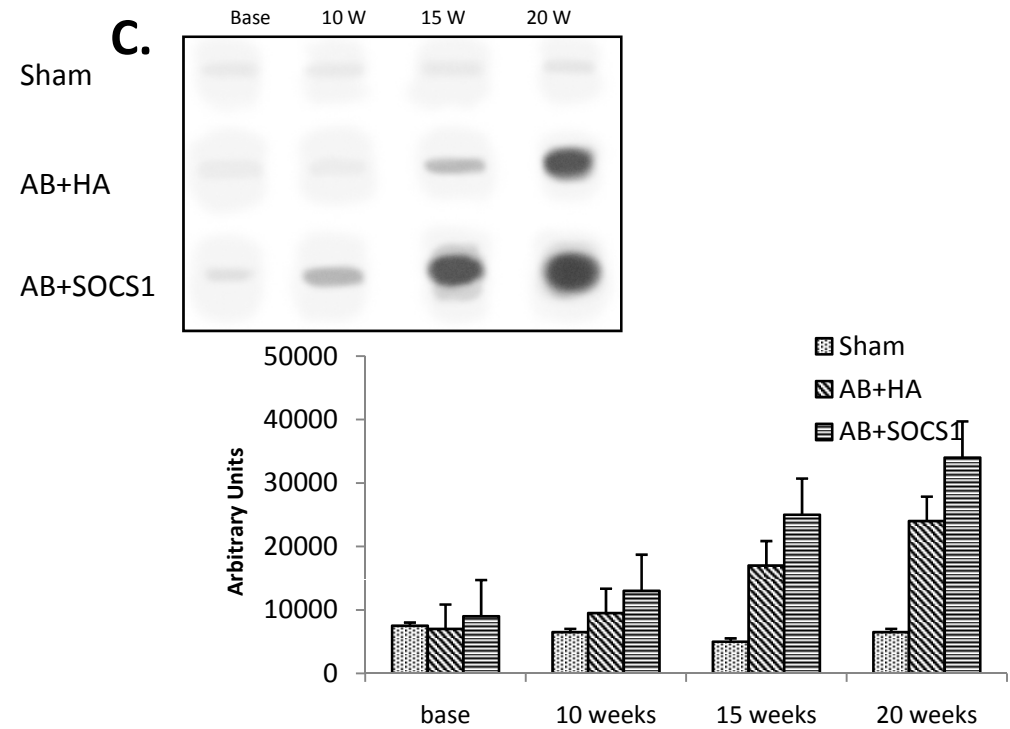

Figure S1
