# Supplementary material
Source: PubMed Central journal article supplement (PMC3732068)
Supplement: supp_cvs261_cvs261supp_fig2.pdf [file supp_cvs261_cvs261supp_fig2.pdf]

|                                                            | Sham   |        |        |        | Sham+HA |        |        |        | Sham+SOCS1 |        |        |        |
|------------------------------------------------------------|--------|--------|--------|--------|---------|--------|--------|--------|------------|--------|--------|--------|
|                                                            | base   | 10W    | 15W    | 20W    | base    | 10W    | 15W    | 20W    | base       | 10W    | 15W    | 20W    |
| LV diastolic diameter, mm                                  | 7.5±.6 | 7.7±.7 | 7.8±.7 | 7.8±.5 | 7.9±.5  | 7.9±.6 | 7.8±.5 | 7.9±.8 | 7.8±.5     | 7.7±.8 | 7.6±.7 | 7.8±.6 |
| LV fractional shortening, %                                | 49±3   | 47±2   | 47±2   | 48±3   | 50±3    | 49±4   | 48±3   | 49±3   | 50±2       | 49±4   | 48±4   | 50±4   |
| LV end-diastolic pressure mmHG                             | 4±1    | 4±1    | 4±1    | 4±1    | 4±1     | 5±1    | 4±1    | 5±1    | 4±1        | 3±.8   | 3±.7   | 3±.6   |
| LV meridional diastolic wall stress, kdyne/cm <sup>2</sup> | 6±1    | 7±2    | 7±2    | 7±1    | 7±2     | 7±3    | 8±2    | 8±2    | 7±1        | 6±1    | 8±2    | 7±1    |

|                                                            | AB     |        |        |        | AB+HA  |        |        |         | AB+SOCS1 |        |         |         |
|------------------------------------------------------------|--------|--------|--------|--------|--------|--------|--------|---------|----------|--------|---------|---------|
|                                                            | base   | 10W    | 15W    | 20W    | base   | 10W    | 15W    | 20W     | base     | 10W    | 15W     | 20W     |
| LV diastolic diameter, mm                                  | 7.7±.4 | 8.4±.4 | 8.8±.6 | 9.8±.6 | 7.8±.6 | 8.7±.7 | 9.0±.5 | 10.3±.7 | 7.8±.5   | 9.1±.7 | 10.5±.4 | 11.7±.5 |
| LV fractional shortening, %                                | 49±2   | 46±3   | 44±3   | 35±4   | 48±3   | 44±3   | 43±4   | 32±3    | 50±3     | 35±4   | 29±4    | 24 ±3   |
| LV end-diastolic pressure mmHG                             | 5±1    | 8±1.6  | 14±3   | 16±3   | 4±1    | 9±1.7  | 12±4   | 15±4    | 4±1      | 15 ±3  | 22±2    | 25±3    |
| LV meridional diastolic wall stress, kdyne/cm <sup>2</sup> | 8±1    | 15±3   | 35±3   | 42±3   | 7±1    | 20±4   | 40±6   | 46±5    | 8±1      | 38±4   | 58±5    | 64±5    |

Figure S2
