# Supplementary material
Source: PubMed Central journal article supplement (PMC3732068)

**A.**

### TNF- $\alpha$ Dose-Response curve

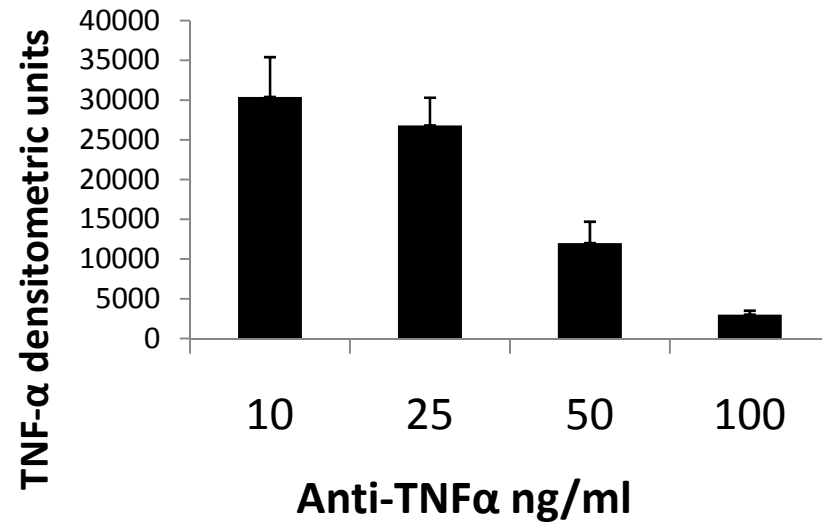

**B.**

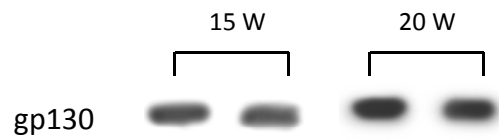

### gp 130

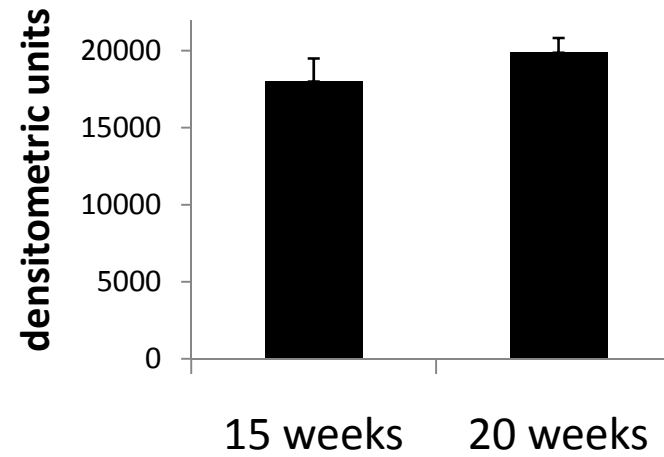

Figure S3

Supplement: supp_cvs261_cvs261supp_fig3.pdf [file supp_cvs261_cvs261supp_fig3.pdf]

**A.**

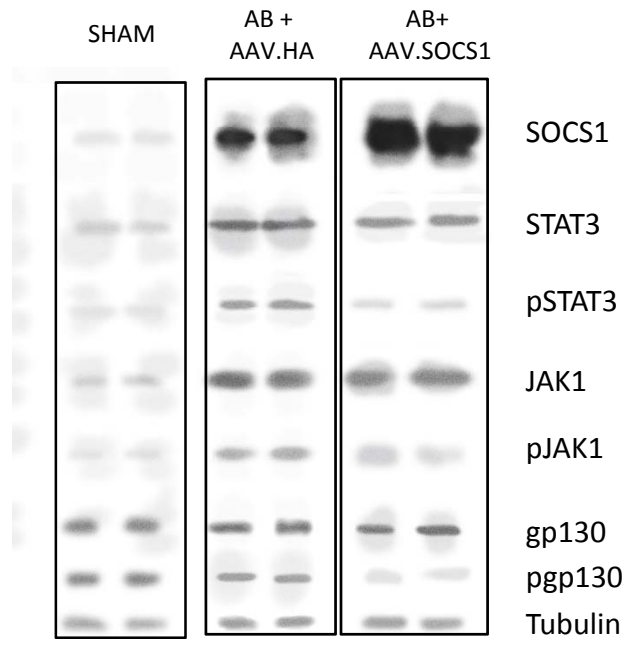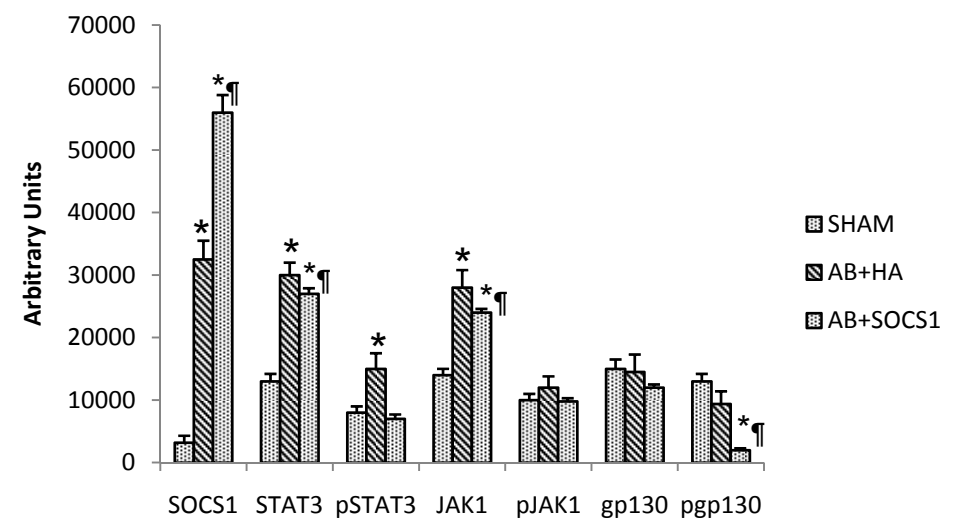

Figure S4

Supplement: supp_cvs261_cvs261supp_fig4.pdf [file supp_cvs261_cvs261supp_fig4.pdf]
